# Supplementary material
Source: MDPI journal article supplement (https://www.mdpi.com/2071-1050/13/15/8533)
Supplement: s1 [file s1]

Supplementary Materials for

**Prediction Models of Barite Crystallization and  
Inhibition Kinetics: Applications for Oil and Gas  
Industry**

Chong Dai<sup>†,\*1</sup>, Zhaoyi Dai<sup>†,\*1</sup>, Yue Zhao<sup>1</sup>, Xin Wang<sup>1</sup>, Samiridhdi Paudyal<sup>1</sup>, Saebom Ko<sup>1</sup>, Amy  
T. Kan<sup>1</sup>, and Mason Tomson<sup>1</sup>

1. Department of Civil & Environmental Engineering,

Rice University, Houston, TX 77005

<sup>†</sup> **Equal Contribution**

**Summary**

5 pages included 2 tables

**Table S1.** Detailed Information of 18 common inhibitors used in barite inhibition experiments

| # | Inhibitor<br>Abbreviate | Chemical Name                                               | Chemical structure                                                                   |
|---|-------------------------|-------------------------------------------------------------|--------------------------------------------------------------------------------------|
| 1 | NTMP                    | Nitrilo tri(methylene phosphonic) acid                      | 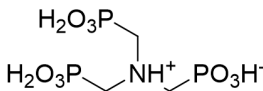   |
| 2 | BHPMP                   | Bis-hexamethylene triamine-penta(methylene phosphonic) acid |    |
| 3 | DTPMP                   | Diethylene triamine-penta(methylene phosphonic) acid        |    |
| 4 | HDTMP                   | Hexamethylene diamine-tetra(methylene phosphonic) acid      |  |
| 5 | EDTMP                   | Ethylenediamine tetra(methylene phosphonic) acid            |  |
| 6 | HEDP                    | 1-hydroxyethylidene-1,1-diposphonic acid                    |   |
| 7 | HEBMP                   | Hydroxyethyl amino bis(methylene phosphonic) acid           |  |

|    |        |                                               |                                                                                      |
|----|--------|-----------------------------------------------|--------------------------------------------------------------------------------------|
| 8  | PhnAA  | Phosphonated amino acid                       | 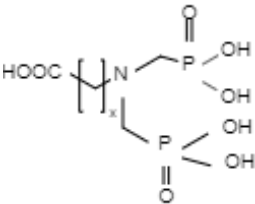   |
| 9  | PAPEMP | Polyamino polyester methylene phosphonic acid |    |
| 10 | PBTC   | 2-phosphono 1,2,4-butane tricarboxylic acid   |    |
| 11 | PE     | Triethanolamine Phosphate ester               |   |
| 12 | PPCA   | Phosphinopolycarboxylic acid                  |  |
| 13 | MAC    | Phosphorous incorporated maleic acid polymer  |  |
| 14 | PASP   | Polyaspartatic acid                           |  |

|    |         |                                            |                                                                                      |
|----|---------|--------------------------------------------|--------------------------------------------------------------------------------------|
| 15 | CMI     | Carboxymethylinulin<br>(0.25 substitution) | 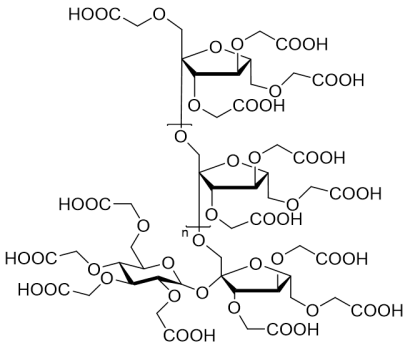   |
| 16 | SPCA    | Sulfonated<br>polycarboxylate              |    |
| 17 | PVS     | Polyvinyl sulfonate                        |     |
| 18 | AA/AMPS | Sulfonated polyacrylic<br>acid copolymer   |  |

**Table S2.** The name and numbers of functional groups for 18 inhibitors

| Inhibitors | MW   | #amino-<br>phosphonate<br>(c1) | #C-<br>phosphonate<br>(c2) | #N-<br>C-OH<br>(c3) | #phosphonate<br>-ester<br>(c4) | #C-<br>O-C<br>(c5) | #<br>carboxylate<br>(c6) | #<br>sulfonate<br>(c7) |
|------------|------|--------------------------------|----------------------------|---------------------|--------------------------------|--------------------|--------------------------|------------------------|
| NTMP       | 299  | 3                              |                            |                     |                                |                    |                          |                        |
| BHPMP      | 685  | 5                              |                            |                     |                                |                    |                          |                        |
| DTPMP      | 573  | 5                              |                            |                     |                                |                    |                          |                        |
| HDTMP      | 492  | 4                              |                            |                     |                                |                    |                          |                        |
| EDTMP      | 436  | 4                              |                            |                     |                                |                    |                          |                        |
| HEDP       | 206  |                                | 2                          |                     |                                |                    |                          |                        |
| HEBMP      | 249  | 2                              |                            | 1                   |                                |                    |                          |                        |
| PhnAA      | 270  | 2                              |                            |                     |                                |                    | 1                        |                        |
| PAPEMP     | 600  | 4                              |                            |                     |                                | 2.5                |                          |                        |
| PBTC       | 270  |                                | 1                          |                     |                                |                    | 3                        |                        |
| PE         | 389  |                                |                            |                     | 3                              |                    |                          |                        |
| PPCA       | 3800 |                                |                            |                     |                                |                    | 51                       |                        |
| PMAC       | 188  |                                |                            |                     |                                |                    | 3                        |                        |
| PASP       | 114  |                                |                            |                     |                                |                    | 1                        |                        |
| SPCA       | 180  |                                |                            |                     |                                |                    | 1                        | 1                      |
| PVS        | 107  |                                |                            |                     |                                |                    |                          | 1                      |
| AA/AMPS    | 279  |                                |                            |                     |                                |                    | 1                        | 1                      |
| CMI        | 274  |                                |                            |                     |                                | 1.25               | 0.75                     |                        |
